# Supplementary material for: Experience transforms crossmodal object representations in the anterior temporal lobes
Source: eLife journal article supplement (doi:10.7554/elife.83382), 2024-04-22

a. Pairwise Similarity Task: “How Similar?”

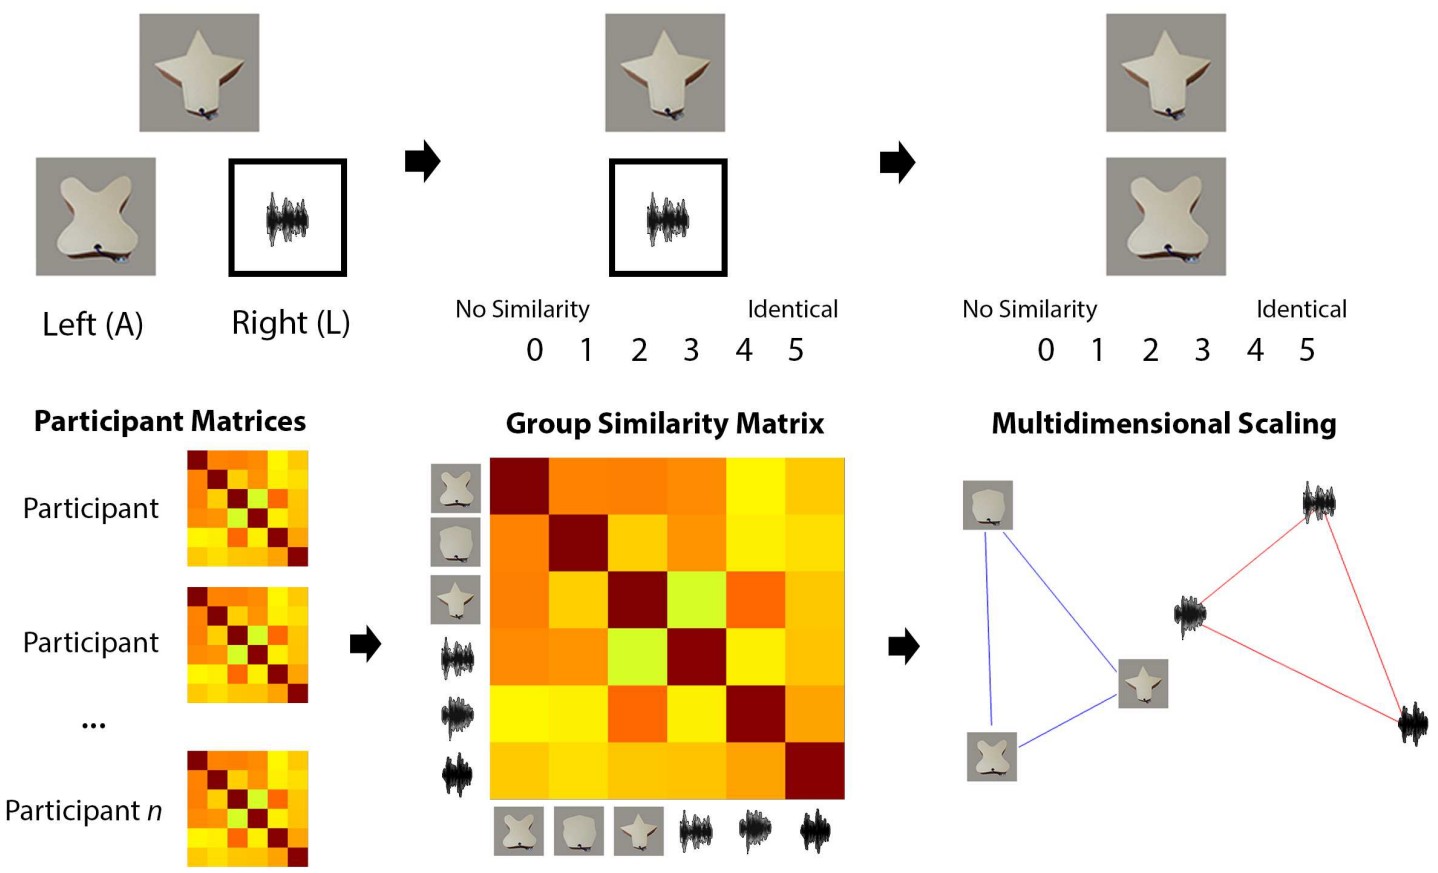

b. 4-Day Crossmodal Learning Task (n = 18)

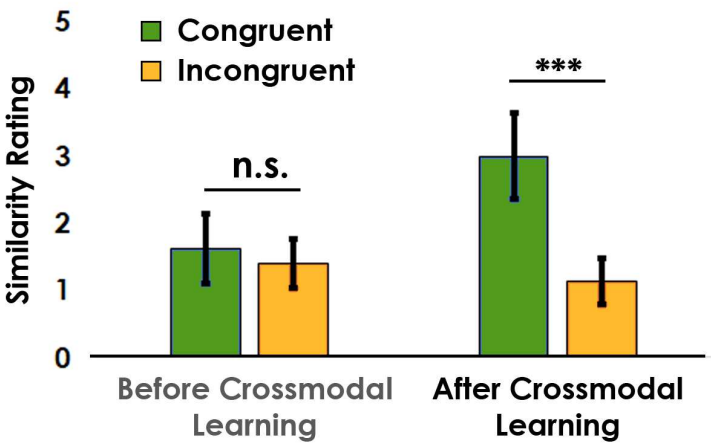

c. Crossmodal Learning Task Replication (n = 44)

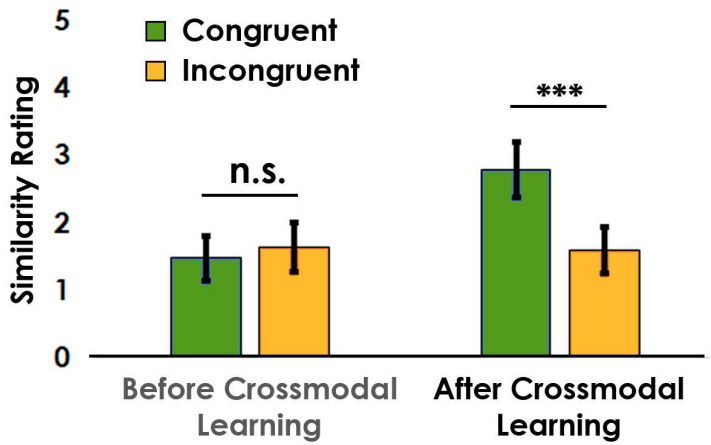

Supplement: supp [file elife-83382-supp-v1.zip]
