# Supplementary material for: Experience transforms crossmodal object representations in the anterior temporal lobes
Source: eLife journal article supplement (doi:10.7554/elife.83382), 2024-04-22
Supplement: supp [file elife-83382-supp-v1.zip]

## a. Multi-echo fMRI Sequence

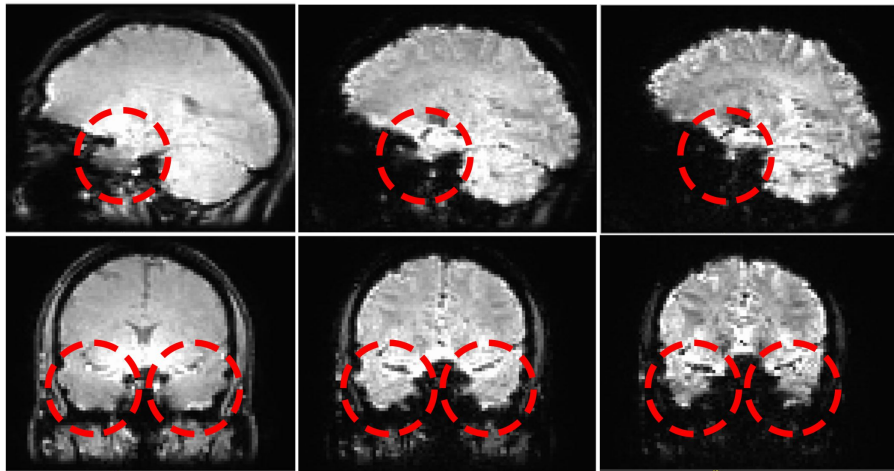

**Echo 1**

TE = 11 ms

**Echo 2 (Standard EPI)**

TE = 31.6 ms

**Echo 3**

TE = 52.2 ms

## b. Optimal Combination with ICA

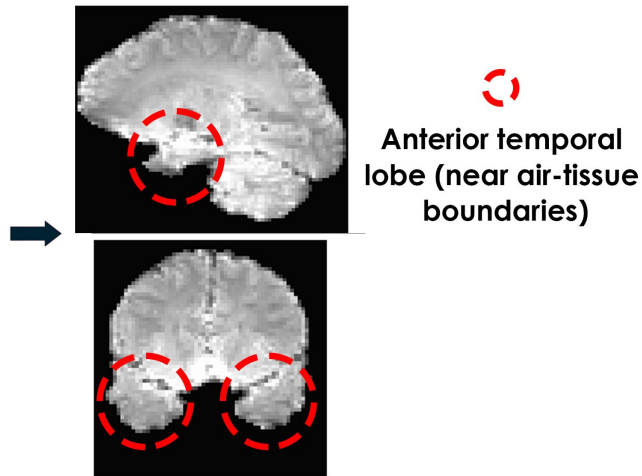

**Combined Echoes**
