# Supplementary material for: Experience transforms crossmodal object representations in the anterior temporal lobes
Source: eLife journal article supplement (doi:10.7554/elife.83382), 2024-04-22

### a. Unimodal Runs: Visual vs Auditory

Main Text Figure 3c

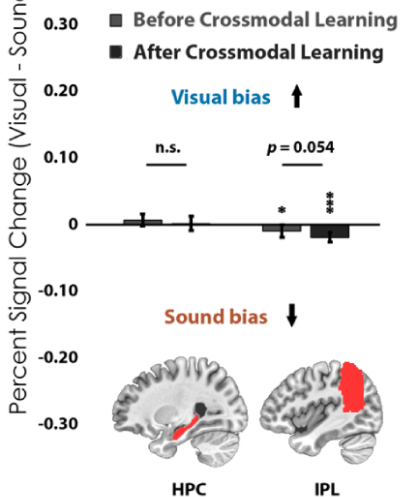

### b. Pattern Similarity Analysis (Unimodal Runs)

Main Text Figure 4

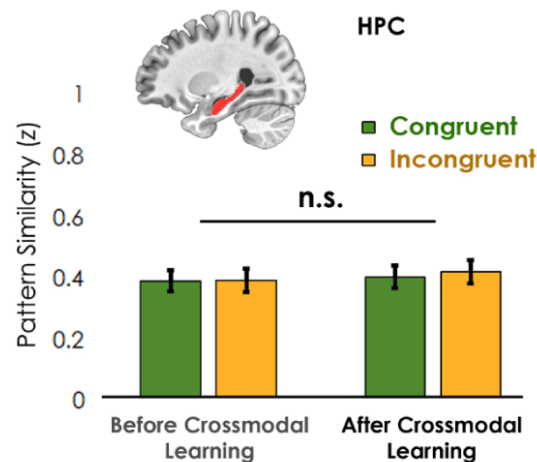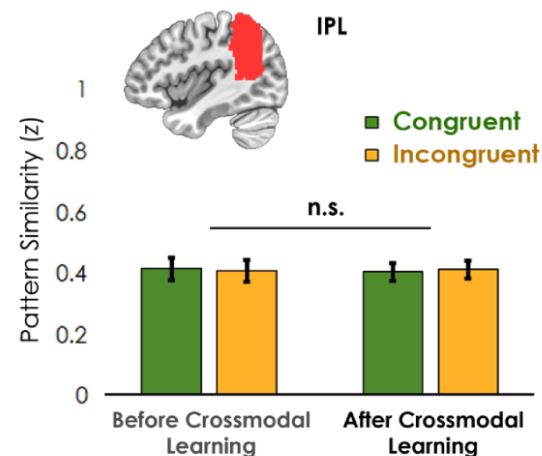

### c. Day 2 x Day 2

Main Text Figure 5a

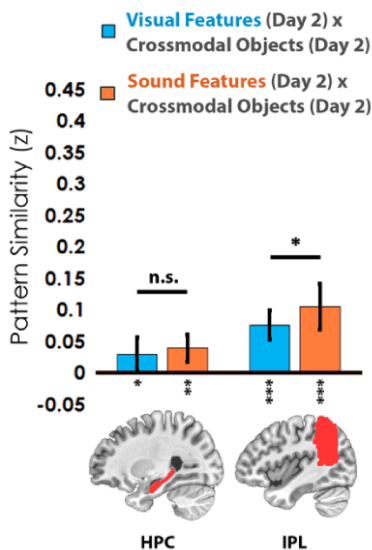

### d. Day 2 x Day 4

Main Text Figure 5b

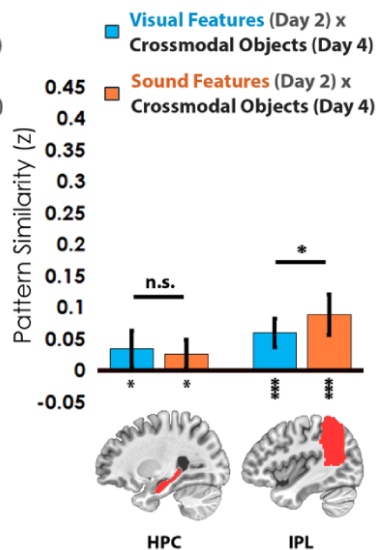

### e. Day 4 x Day 4

Supplemental Figure S5

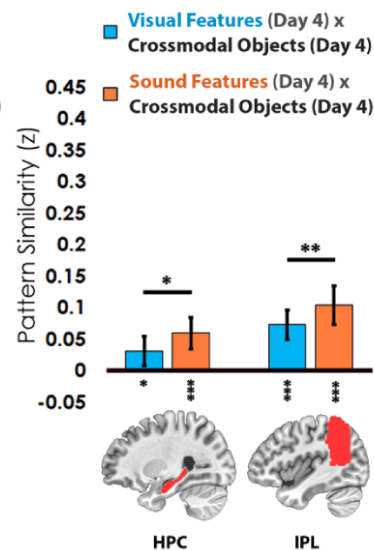

### f. Crossmodal Object Runs Before and After Crossmodal Learning

Main Text Figure 6

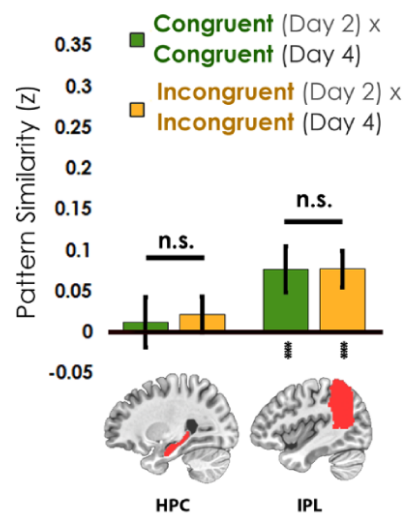

Supplement: supp [file elife-83382-supp-v1.zip]
