# Supplementary figures and images for: Experience transforms crossmodal object representations in the anterior temporal lobes
Source: eLife journal article supplement (doi:10.7554/elife.83382), 2024-04-22

**a.**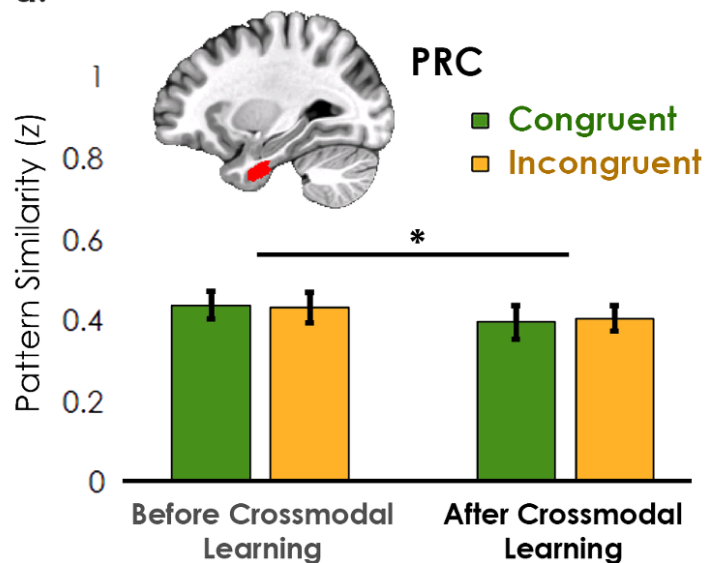**b.**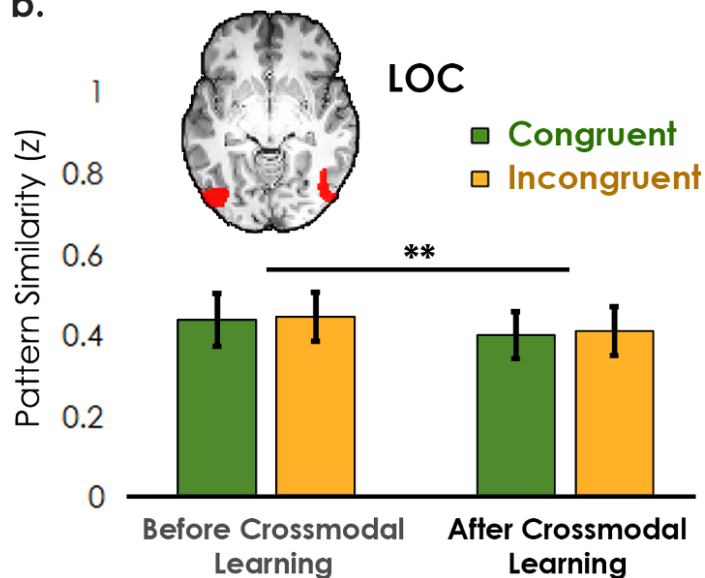**c.**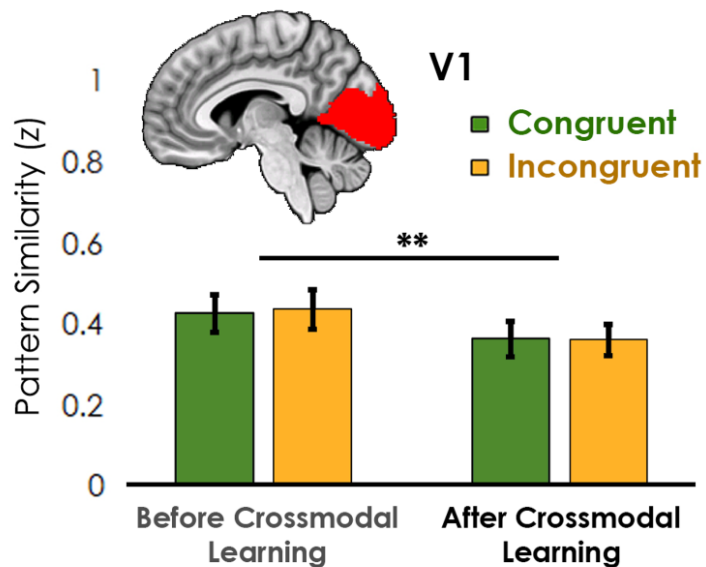**d.**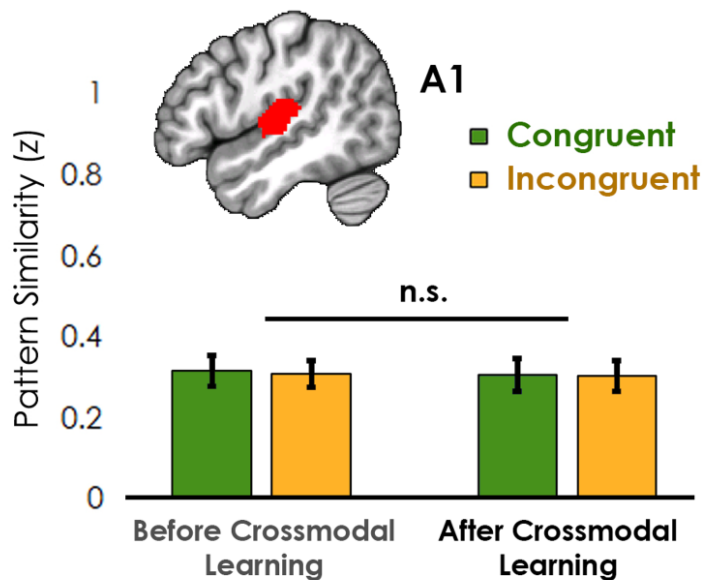

Supplement: supp [file elife-83382-supp-v1.zip]

■ **Visual Features** (Day 4) x  
Crossmodal Objects (Day 4)

■ **Sound Features** (Day 4) x  
Crossmodal Objects (Day 4)

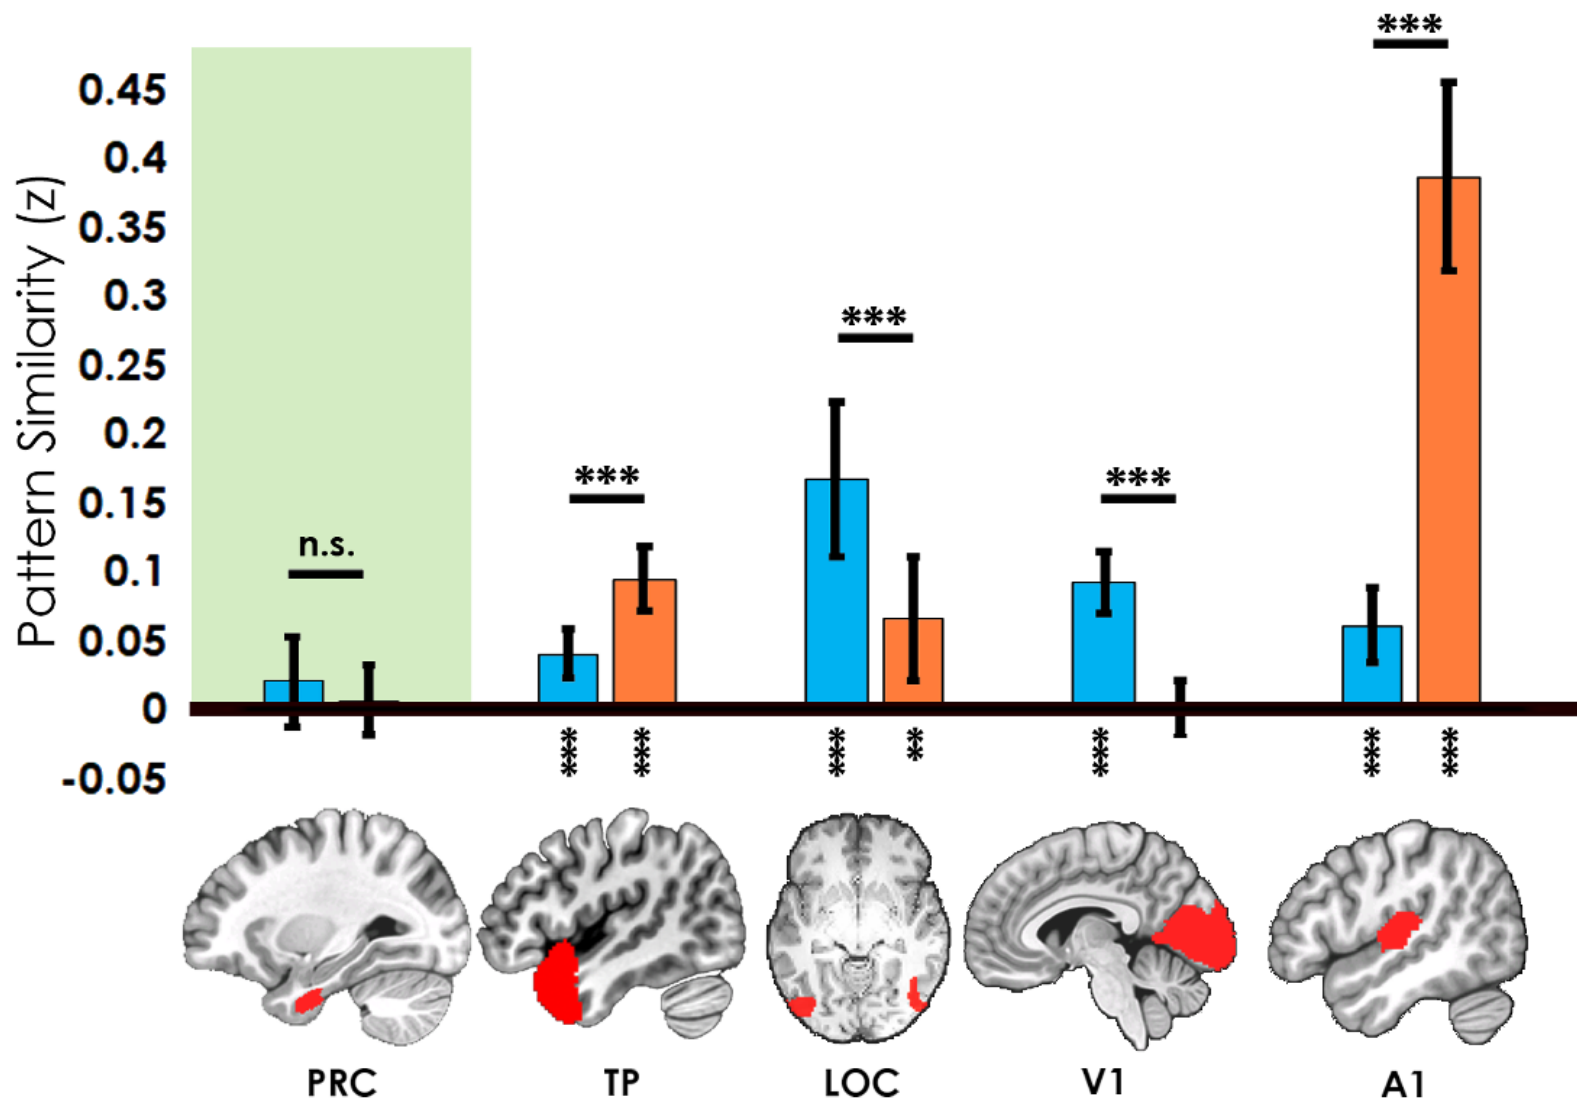

Supplement: supp [file elife-83382-supp-v1.zip]
